# Supplementary material for: Neurocomputational mechanisms underlying immoral decisions benefiting self or others
Source: PubMed Central journal article supplement — Soc Cogn Affect Neurosci. 2020 Mar 12;15(2):135–49. doi: 10.1093/scan/nsaa029 (PMC7304519; doi:10.1093/scan/nsaa029), 2020-03-12
Supplement: file008_nsaa029.pdf [file file008_nsaa029.pdf]

1 **Supporting Information for**  
2  
3 **Neurocomputational mechanisms underlying immoral decisions**  
4 **benefiting self or others**  
5

6 Chen Qu<sup>1,†,\*</sup>, Yang Hu<sup>2,3,†,\*</sup>, Zixuan Tang<sup>2,4</sup>, Edmund Derrington<sup>2,4</sup>, Jean-Claude Dreher<sup>2,4\*</sup>

7 <sup>1</sup>Center for Studies of Psychological Application, School of Psychology, South China Normal  
8 University, Guangzhou, China

9 <sup>2</sup>Neuroeconomics Laboratory, Institut des Sciences Cognitives Marc Jeannerod, CNRS, Bron,  
10 France

11 <sup>3</sup>School of Psychological and Cognitive Sciences, Peking University, Beijing, China

12 <sup>4</sup>Université Claude Bernard Lyon 1, Lyon, France  
13

14

15 †These authors equally contributed to this work

16 \*Correspondence at [fondest@163.com](mailto:fondest@163.com), [huyang200606@gmail.com](mailto:huyang200606@gmail.com), or [dreher@isc.cnrs.fr](mailto:dreher@isc.cnrs.fr)  
17

17

18 **This supporting information includes:**

19 SI: Association selection

20 SI: Pilot behavioral study

21 Supporting Figures: S1 to S9

22 Supporting Tables: S1 to S8

23 References for SI reference citations

24 **SI: Association selection**

25 **Procedure**

26 An independent group of participants (N = 30) attended the rating task for selecting the  
27 associations used for the fMRI study. 16 different associations were used for the rating task.  
28 Besides those associations used in the fMRI study (i.e., 4 charities and 4 associations  
29 supporting the rights to own guns or hunting), there were another 4 charities and 4 associations  
30 supporting the legalization of soft drugs (see **vignettes and logos** below; also see **Fig. S7a**).  
31 Participants read vignettes (with the logo) which described the goal of each association.  
32 Vignettes were presented in a pseudo-random fashion.

33 Below each vignette, participants were asked to complete a series of questions by  
34 indicating degrees on a Likert rating scale, including 1) degree of familiarity (0 = “not at all”, 10 =  
35 “very much”), 2) degree of liking (-10 = “not at all” or “very negative”, 0 = “no preference”, 10 =  
36 “very much” or “very positive”), 3) degree of moral acceptance (-10 = “not at all”, 0 = “no  
37 preference”, 10 = “very much”), 4) degree of approval for its goal (-10 = “not at all”, 0 = “no  
38 preference”, 10 = “very much”), 5) amount of (hypothetical) donation (from 0 to 10; in CNY) and  
39 6) degree of moral conflict while donating (0 = “not at all”, 10 = “very much”).

40 A rating summary of all associations in all questions by all participants is listed in **Table**  
41 **S5**. To induce stronger morally negative feelings we finally decided to use associations in  
42 support of gun ownership or hunting as the morally bad causes. Besides, since these morally  
43 bad causes were largely unknown to local participants, we chose to adopt charities with lower  
44 familiarity to participants for the current fMRI study to better control for familiarity difference  
45 between charities and bad causes (see **Table S5** and **Fig. S7b**).

46 To justify our selection, we compared the rating scores in all questions between the  
47 charities and morally bad causes used in the current fMRI study. Neither the charities nor the  
48 morally bad causes were familiar to participants, indicated by the low average scores of

49 familiarity (i.e., less than 2 on a 0-10 Likert scale; mean  $\pm$  SD: charity:  $1.3 \pm 1.4$ ; morally bad  
50 cause:  $0.5 \pm 0.8$ ). As expected, participants donated much more (charity vs. bad cause [mean  $\pm$   
51 SD; same below]:  $6.9 \pm 2.2$  vs.  $0.6 \pm 1.2$ ; b (95% confidence interval (CI)) = 6.34 (5.76, 6.92),  
52 SE = 0.28,  $t(6) = 22.37$ ,  $p < 0.001$ , Cohen's  $d = 18.3$ ) and showed significantly higher levels of  
53 liking ( $7.1 \pm 1.7$  vs.  $-5.0 \pm 2.9$ ; b (95% CI) = 12.13 (10.83, 13.42), SE = 0.67,  $t(6) = 18.12$ ,  $p <$   
54  $0.001$ , Cohen's  $d = 14.8$ ), moral acceptance ( $8.2 \pm 1.6$  vs.  $-3.7 \pm 3.1$ ; b (95% CI) = 11.84 (9.70,  
55 13.98), SE = 1.11,  $t(6) = 10.70$ ,  $p < 0.001$ , Cohen's  $d = 8.73$ ), approval ( $8.0 \pm 1.7$  vs.  $-4.7 \pm 3.1$ ; b  
56 (95% CI) = 12.71 (11.21, 14.20), SE = 0.77,  $t(6) = 16.54$ ,  $p < 0.001$ , Cohen's  $d = 13.50$ ) and less  
57 moral conflict with the charities than bad causes ( $0.9 \pm 1.7$  vs.  $6.6 \pm 2.5$ ; b (95% CI) = -5.70 (-  
58 6.41, -4.99), SE = 0.35,  $t(6) = -16.21$ ,  $p < 0.001$ , Cohen's  $d = -13.23$ ).

## 59 **Vignettes and Logos**

### 60 **Charity**

#### 61 **Charities familiar to local participants (CF)**

62 **International Committee of the Red Cross (ICRC)**; official website: <https://www.icrc.org>) was  
63 founded 1863 and is a humanitarian institution based in Geneva, Switzerland. It is one of the  
64 most widely recognized organizations in the world, having won three Nobel Peace Prizes in  
65 1917, 1944, and 1963. ICRC aims to protect victims of international and internal armed conflicts.  
66 Such victims include war wounded, prisoners, refugees, civilians, and other non-combatants.

67 (Information source: [https://en.wikipedia.org/wiki/International\\_Committee\\_of\\_the\\_Red\\_Cross](https://en.wikipedia.org/wiki/International_Committee_of_the_Red_Cross) )

68 **The United Nations Children's Fund (UNICEF)**; official website: <https://www.unicef.org/>) was  
69 founded in 1946 and is a United Nations (UN) program headquartered in New York City that  
70 provides humanitarian and developmental assistance to children and mothers in developing  
71 countries. UNICEF programs emphasize developing community-level services to promote the  
72 health and well-being of children. UNICEF was awarded the Nobel Peace Prize in 1965 and the  
73 Prince of Asturias Award of Concord in 2006.

74 (Information source: <https://en.wikipedia.org/wiki/UNICEF> )

75 **SOS Children's Villages** (official website: <http://www.sos-childrensvillages.org/>) was founded in  
76 1949 and is an independent, non-governmental international development organization which  
77 has been working to meet the needs and protect the interests and rights of children. The  
78 organization's work focuses on abandoned, destitute and orphaned children requiring family-  
79 based child care. Children are supported to recover from being emotionally traumatized and to  
80 avoid the real danger of being isolated, abused, exploited and deprived of their rights.

81 (Information source: [https://en.wikipedia.org/wiki/SOS\\_Children%27s\\_Villages](https://en.wikipedia.org/wiki/SOS_Children%27s_Villages) )

82 **World Wide Fund for Nature (WWF)**; official website:

83 [https://en.wikipedia.org/wiki/World\\_Wide\\_Fund\\_for\\_Nature](https://en.wikipedia.org/wiki/World_Wide_Fund_for_Nature)) was founded in 1961 and is an  
84 international non-governmental organization, working in the field of the wilderness preservation,  
85 and the reduction of humanity's footprint on the environment. It is the world's largest  
86 conservation organization with over five million supporters worldwide. The group's mission is "to  
87 stop the degradation of the planet's natural environment and to build a future in which humans  
88 live in harmony with nature." Currently, much of its work concentrates on the conservation of  
89 oceans and coasts, forests, and freshwater ecosystems.

90 (Information source: [https://en.wikipedia.org/wiki/World\\_Wide\\_Fund\\_for\\_Nature](https://en.wikipedia.org/wiki/World_Wide_Fund_for_Nature) )

91

92 *Charities unfamiliar to local participants (CUF; finally used in the pilot and the fMRI study)*

93 **Oxford Committee for Famine Relief (OXFAM)**; official website: <https://www.oxfam.org/>) was  
94 founded in 1942 in Oxford, and is an international confederation of charitable organizations  
95 focused on the alleviation of global poverty. OXFAM's programs address the structural causes  
96 of poverty and related injustice and work primarily through local accountable organizations,  
97 seeking to enhance their effectiveness. OXFAM's stated goal is to help people directly when  
98 local capacity is insufficient or inappropriate for OXFAM's purposes and to assist in the

99 development of structures which directly benefit people facing the realities of poverty and  
100 injustice. (Information source: <https://en.wikipedia.org/wiki/Oxfam>)

101 **Save the Children** (also known as the Save the Children Fund; official website:  
102 <https://www.savethechildren.net/>) was founded in 1919 in London, and is an international non-  
103 governmental organization that promotes children's rights, provides relief and helps support  
104 children in developing countries. Save the Children uses a holistic approach to help us achieve  
105 more for children, and to use resources in an efficient and sustainable way.

106 (Information source: [https://en.wikipedia.org/wiki/Save\\_the\\_Children](https://en.wikipedia.org/wiki/Save_the_Children);  
107 <https://www.savethechildren.net/about-us>)

108 **First Aid Africa** (FAA; official website: <http://www.firstafrica.org/>) was founded in 2008 in  
109 Edinburg and is a humanitarian charity that works in rural parts of southeastern Africa to provide  
110 sustainable equipment and education in first aid. FAA explains that a small amount of medical  
111 knowledge and equipment' can make a difference. Volunteers and students receive some  
112 training before traveling to Africa to teach first aid and survival skills in settings such as local  
113 communities, schools, orphanages, and villages.

114 (Information source: [https://en.wikipedia.org/wiki/First\\_Aid\\_Africa](https://en.wikipedia.org/wiki/First_Aid_Africa) )

115 **Oceana** (official website: <http://oceana.org/>) was found in 2001, Washington and is the largest  
116 international ocean conservation and advocacy organization. Oceana works to protect and  
117 restore the world's oceans through targeted policy campaigns. Oceana bases its policy  
118 campaign goals on science to achieve concrete and measurable results through targeted  
119 campaigns that combine policy, advocacy, science, law, media, and public pressure to prevent  
120 the collapse of fish populations, marine mammals and other sea life caused by industrial fishing  
121 and pollution.

122 (Information source: [https://en.wikipedia.org/wiki/Oceana\\_\(non-profit\\_group\)](https://en.wikipedia.org/wiki/Oceana_(non-profit_group)) )

123

124

125 **Morally Bad Cause**

126 **Drug Legalization Associations (D)**

127 **Law Enforcement Action Partnership (LEAP;** formerly Law Enforcement Against Prohibition;  
128 official website : <https://lawenforcementactionpartnership.org/>) was founded in 2002 and is a  
129 non-profit, international, educational organization comprising former and current police officers,  
130 government agents and other law enforcement agents who oppose the current War on Drugs. In  
131 January 2017, while reaffirming their commitment to ending the War on Drugs, LEAP became  
132 the Law Enforcement Action Partnership in order to advocate for solutions across a broader  
133 range of drug policy and criminal justice issues.

134 (Information source: [https://en.wikipedia.org/wiki/Law\\_Enforcement\\_Action\\_Partnership](https://en.wikipedia.org/wiki/Law_Enforcement_Action_Partnership);  
135 <https://www.dinafem.org/en/blog/cannabis-marijuana-legalization-groups/> )

136 **European Coalition for Just and Effective Drug Policies (ENCOD;** official website:  
137 <http://www.encod.org/info/-English-en-.html>) was founded in 1993 and is a European non-  
138 governmental organization which brings European citizens together who believe that drug  
139 prohibition is an immoral and insane policy. Since 1994 they have been working to advocate  
140 more just and effective drugs control policies, which include an integrated solution for all  
141 problems related to the global drugs phenomenon.

142 (Information source:  
143 [https://en.wikipedia.org/wiki/European\\_Coalition\\_for\\_Just\\_and\\_Effective\\_Drug\\_Policies](https://en.wikipedia.org/wiki/European_Coalition_for_Just_and_Effective_Drug_Policies);  
144 <https://www.dinafem.org/en/blog/cannabis-marijuana-legalization-groups/> )

145 **Marijuana Policy Project (MPP;** official website: <https://www.mpp.org/>) was founded in 1995  
146 and is the largest organization working solely on marijuana policy reform in the United States.  
147 Its stated aims include: (1) increase public support for non-punitive, non-coercive marijuana  
148 policies and (2) change state laws to reduce or eliminate penalties for the medical and non-

149 medical use of marijuana. MPP believes the greatest harm associated with marijuana is a prison,  
150 so their focus is on removing criminal penalties for marijuana use.

151 (Information source: [https://en.wikipedia.org/wiki/Marijuana\\_Policy\\_Project](https://en.wikipedia.org/wiki/Marijuana_Policy_Project);

152 <https://www.dinafem.org/en/blog/cannabis-marijuana-legalization-groups/>)

153 **National Organization for the Reform of Marijuana Laws (NORML;** official website:

154 <http://norml.org/>) was founded in 1970 and is an American non-profit organization whose aim is

155 to move public opinion sufficiently to achieve the legalization of non-medical marijuana in the

156 United States so that the responsible use of cannabis by adults is no longer subject to penalty.

157 NORML supports the removal of all criminal penalties for the private possession and

158 responsible use of marijuana by adults, including the cultivation for personal use, and the casual

159 nonprofit transfers of small amounts.

160 (Information source:

161 [https://en.wikipedia.org/wiki/National\\_Organization\\_for\\_the\\_Reform\\_of\\_Marijuana\\_Laws](https://en.wikipedia.org/wiki/National_Organization_for_the_Reform_of_Marijuana_Laws) )

## 162 **Morally Bad Cause**

163 *Gun/Hunting Rights Advocacy Associations (GH; finally used in the pilot and the fMRI study)*

164 **National Rifle Association of America (NRA;** official website: <https://home.nra.org/>) is an

165 American nonprofit organization which advocates for gun rights. Founded in 1871 to advance

166 rifle marksmanship, the modern NRA continues to teach firearm competency and safety. NRA

167 has been criticized by newspaper editorial boards, gun control and gun rights advocacy groups,

168 political commentators, and politicians. For instance, a Washington Post/ABC News poll in

169 January 2013 showed that only 36 percent of Americans had a favorable opinion of NRA

170 leadership.

171 (Information source: [https://en.wikipedia.org/wiki/National\\_Rifle\\_Association](https://en.wikipedia.org/wiki/National_Rifle_Association) )

172 **The European Federation of Associations for Hunting and Conservation of the EU (FACE;**

173 official website: <http://www.face.eu/>) was founded in 1977, and is a non-profit, non-

174 governmental organization which is pro-hunting and pro-gun. FACE protested a 2016 proposal  
175 by the European Union to revise the EU's firearm regulations, saying it would ban muzzle-  
176 loading weapons. In 2016 FACE opposed an EU proposal to ban the import of hunting trophies  
177 from certain African countries.

178 (Information source:

179 [https://en.wikipedia.org/wiki/Federation\\_of\\_Associations\\_for\\_Hunting\\_and\\_Conservation\\_of\\_the](https://en.wikipedia.org/wiki/Federation_of_Associations_for_Hunting_and_Conservation_of_the)  
180 [EU](#) )

181 **The Society for Liberal Weapons Rights (ProTell;** official website: <https://www.protell.ch/de/>)

182 is a Swiss gun-rights advocacy group based in Bern, Switzerland. The association was founded  
183 in 1978 with the purpose of defending the right of law-abiding citizens to carry arms, and is  
184 opposed to any restrictions in this regard. ProTell was one of the principal opponents to the  
185 federal popular initiative "For the protection against gun violence", brought to a referendum on  
186 February 13, 2011. The initiative was broadly rejected by the voters.

187 (Information source: <https://en.wikipedia.org/wiki/ProTell> )

188 **Safari Club International (SCI;** official website: <https://www.safariclub.org/>) is an international

189 organization composed of hunters dedicated to protecting the freedom to hunt and promoting  
190 wildlife conservation. SCI has been criticized for supporting the hunting of endangered African  
191 antelope species at fenced "game" ranches in Texas and Florida and for giving awards for  
192 hunting leopards, elephants, lions, rhinos and buffalo in Africa.

193 (Information source: [https://en.wikipedia.org/wiki/Safari\\_Club\\_International](https://en.wikipedia.org/wiki/Safari_Club_International) )



194 **SI: Pilot behavioral study**

195 **Methods**

196 Thirty undergraduates or graduate students (15 females; mean age:  $20.9 \pm 1.7$  years,  
197 ranging from 18 to 25 years) were recruited via online fliers for the pilot behavioral study.

198 The procedure and behavioral paradigm was same as the fMRI study, except the  
199 following: 1) besides the original payoff matrix (i.e., monetary gain: moral cost = 1:4), we  
200 adopted a balanced matrix with the payoffs ranging from 1 to 8 (in increments of 1; unit: CNY)  
201 for both parties involved in the dilemma (i.e., monetary gain: moral cost = 1:1), thereby  
202 producing 64 different payoff combinations as offers. As a consequence, the pilot study was  
203 extended to 256 trials in total (i.e., 64 trials for each context of moral dilemma displaying offers  
204 produced by different payoff matrices); 2) To maximize the differential effect induced by two  
205 types of payoff matrix, we adopted a mixed design so that offers from the same payoff matrix  
206 were presented in a block (i.e., one block for original and balanced matrix respectively) with the  
207 different dilemmas randomly intermixed in-between. The order of block was counterbalanced  
208 across participants; 3) To reduce the total duration of this experiment, we used a 500ms inter-  
209 trial interval (ITI) showing a cross fixation.

210 We analyzed the data with a similar approach as the fMRI study except that we added  
211 the predictors (i.e., main effect or interaction terms) relevant to matrix type (i.e., dummy variable;  
212 reference-level: original matrix) in the regression analyses.

213

214 **Results**

215 All these associations were selected by participants at least once (see **Fig. S8a**).  
216 Participants were familiar to none of the selected associations, indicated by the low average  
217 scores of familiarity (i.e., less than 3 on a 0-10 Likert scale; mean  $\pm$  SD: charity:  $2.80 \pm 3.10$ ;  
218 bad cause:  $1.63 \pm 2.27$ ). Moreover, they rated the pre-selected charity positively (mean  $\pm$  SD

219 (95% CI):  $7.83 \pm 2.00$  (7.09, 8.58);  $t(29) = 21.44$ ,  $p < 0.001$ , Cohen's  $d = 3.91$ ) whereas they  
220 regarded the pre-selected bad cause negatively (mean  $\pm$  SD (95% CI);  $-7.87 \pm 2.54$  (-8.82, -  
221 6.92);  $t(29) = -16.95$ ,  $p < 0.001$ , Cohen's  $d = 3.09$ ; see **Fig. S8b**).

222 We found a significant matrix  $\times$  context interaction effect on the choice data (Odds Ratio  
223 = 4.33,  $b$  (95% CI) = 1.46 (1.19, 1.74),  $SE = 0.14$ ,  $\chi^2(1) = 106.63$ ,  $p < 0.001$ ) after controlling the  
224 monetary gain and the moral cost. Splitting the data in terms of the matrix type, we found that  
225 participants were less likely to accept the offer in the *charity-bad\_cause* dilemma (vs. *self-*  
226 *bad\_cause* dilemma: accept rate:  $26.4 \pm 25.3$  % vs.  $40.6 \pm 37.4$  %; Odds Ratio = 0.24,  $b$  (95%  
227 CI) = -1.44 (-1.66, -1.22),  $SE = 0.11$ ,  $\chi^2(1) = 170.77$ ,  $p < 0.001$ ) only when the original payoff  
228 matrix was adopted. No difference in acceptance rate between two contexts of moral dilemma  
229 was observed when the balanced payoff matrix was used ( $62.1 \pm 21.8$  % vs.  $62.3 \pm 28.5$  %;  
230 Odds Ratio = 0.98,  $b$  (95% CI) = -0.02 (-0.25, 0.21),  $SE = 0.12$ ,  $\chi^2(1) = 0.03$ ,  $p = 0.861$ ; see **Fig.**  
231 **S8c**; also see **Table S6** for details of model output).

232 For the decision time (DT), we first did the log-transformation due to its non-normal  
233 distribution (Anderson-Darling normality test:  $A = 219.3$ ,  $p < 0.001$ ). Regressions on log-  
234 transformed DT (logDT) revealed a three-way interaction ( $b$  (95% CI) = 0.10 (0.03, 0.16),  $SE =$   
235 0.03,  $t(7643) = 2.93$ ,  $p = 0.003$ , Cohen's  $d = 0.07$ ; see **Table S7** for descriptive summary of DT  
236 and logDT). To unpack the interaction effect, we ran similar regression analyses with matrix,  
237 context and their interaction as fixed-effect predictors for trials with acceptance and rejection  
238 decisions separately. For acceptance trials, we observed a significant two-way interaction on  
239 logDT ( $b$  (95% CI) = -0.12 (-0.16, -0.07),  $SE = 0.02$ ,  $t(3644) = -4.80$ ,  $p < 0.001$ , Cohen's  $d = -$   
240 0.16). Again, we did the simple effect analyses by splitting the accept trials into two parts  
241 depending on matrix type, finding that such two-way interaction was mainly driven by the  
242 stronger effect of dilemma type in prolonging logDT in the *charity-bad\_cause* dilemma (vs. *self-*  
243 *bad\_cause* dilemma) when offers were chosen from the original matrix ( $b$  (95% CI) = 0.15 (0.11,

244 0.19), SE = 0.02,  $t(1265) = 7.41$ ,  $p < 0.001$ , Cohen's  $d = 0.42$ ) than the balanced matrix (b (95%  
245 CI) = 0.04 (0.01, 0.06), SE = 0.01,  $t(2359) = 2.74$ ,  $p = 0.006$ , Cohen's  $d = 0.21$ ). For reject trials,  
246 no two-way interaction effect was detected (b (95% CI) = 0.02 (-0.02, 0.06), SE = 0.02,  $t = 0.970$ ,  
247  $p = 0.332$ , Cohen's  $d = 0.03$ ). We only found that people rejected more slowly in the block  
248 displaying offers from balanced (vs. original) payoff regardless of dilemmas (b (95% CI) = 0.07  
249 (0.04, 0.11), SE = 0.02,  $t(3970) = 3.97$ ,  $p < 0.001$ , Cohen's  $d = 0.13$ ; see **Fig. S9**; also see **Table**  
250 **S8** for details of model output).

## 251 Behavioral Analyses

252 All behavioral analyses were conducted using R (<http://www.r-project.org/>) and relevant  
253 packages (R Core Team, 2014). All reported p values are two-tailed and  $p < 0.05$  was  
254 considered statistically significant. Data visualization were performed via “ggplot2” package  
255 (Wickham H 2016).

256 Regarding the choice data, we performed a repeated mixed-effect logistic regression on  
257 the decision of choosing the “accept” option by the glmer function in “lme4” package (Bates D et  
258 al. 2013), with dilemma (dummy variable; reference level: *self-bad\_cause* dilemma; same below)  
259 and payoffs for both parties involved in each dilemma (i.e., the monetary gain and the moral  
260 cost; mean-centered continuous variable; same below) as the fixed-effect predictors. In addition,  
261 we included the following random-effect factors allowing varying intercept across participants.  
262 For the statistical inference on each predictor, we performed the Type II Wald chi-square test on  
263 the model fits by using the Anova function in “car” package (Fox J et al. 2016), and reported the  
264 odds ratio as relevant effect size.

265 For decision time (DT), we first did a log-transformation due to its non-normal distribution  
266 (Anderson-Darling normality test:  $A = 91.90$ ,  $p < 0.001$ ) and then performed a mixed-effect  
267 linear regression on the log-transformed DT by the lmer function in “lme4” package, with  
268 decision (dummy variable; reference level: accept), dilemma, decision  $\times$  dilemma, as well as  
269 payoffs for both beneficiaries as the fixed-effect predictors. Random-effect factors were  
270 specified in the same way as above. Similar analyses were also performed on the post-  
271 scanning rating except that dilemma was added as the only fixed-effect predictor. We followed  
272 the procedure recommended by Luke (2017) to obtain the statistics for each predictor by  
273 applying the Satterthwaite approximations on the restricted maximum likelihood model (REML)  
274 fit via the “lmerTest” package (Luke SG 2017). In addition, we computed the Cohen’s  $d$  of each  
275 predictor via the “EMAtools” package (Kleiman E 2017), which provided the effect size measure

276 specially for the mixed-effect regressions. For likeness ratings of the selected associations, we  
277 compared whether the ratings significantly differed from 0 in each type of selected associations  
278 (i.e., charity or morally bad causes) respectively by the one-sample T-test, and computed the  
279 Cohen's d as effect size.  
280

281 **Supporting Figures**

282

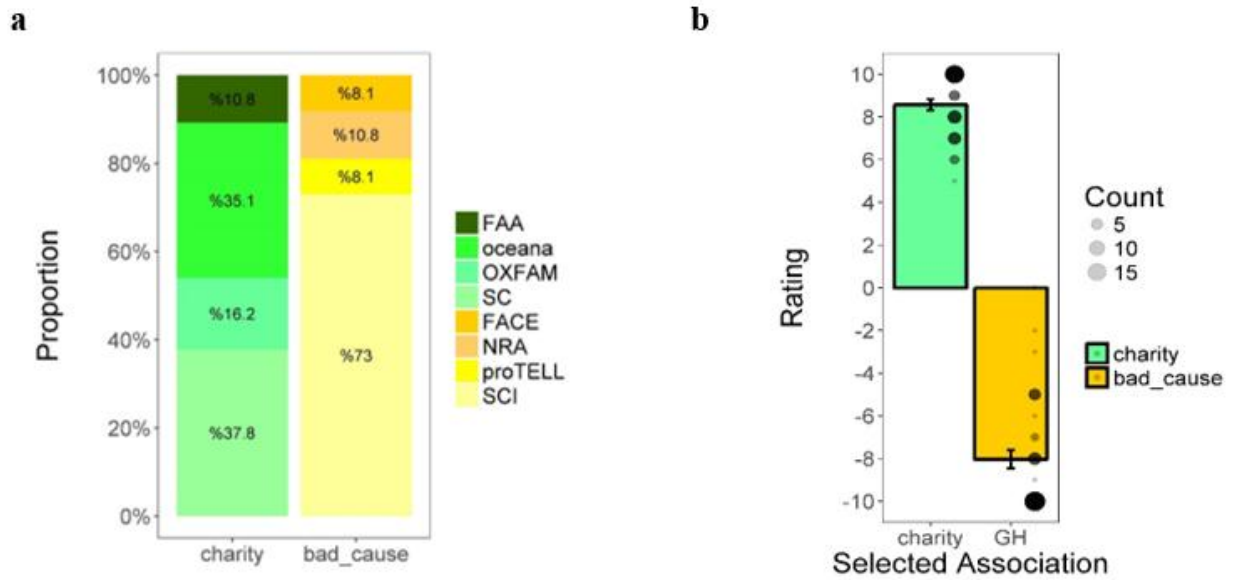

283

284 **Fig. S1.** (a) Summary for the charity and morally bad cause selected by all participants and (b)  
285 mean rating on liking (-10 – 10; -10 = dislike very much, 10 = like very much) for the selected  
286 charities and morally bad causes in the current fMRI study. The black dot refers to the individual  
287 ratings; the size of the dot indicates the numbers of participants with the same rating.

288

289

290

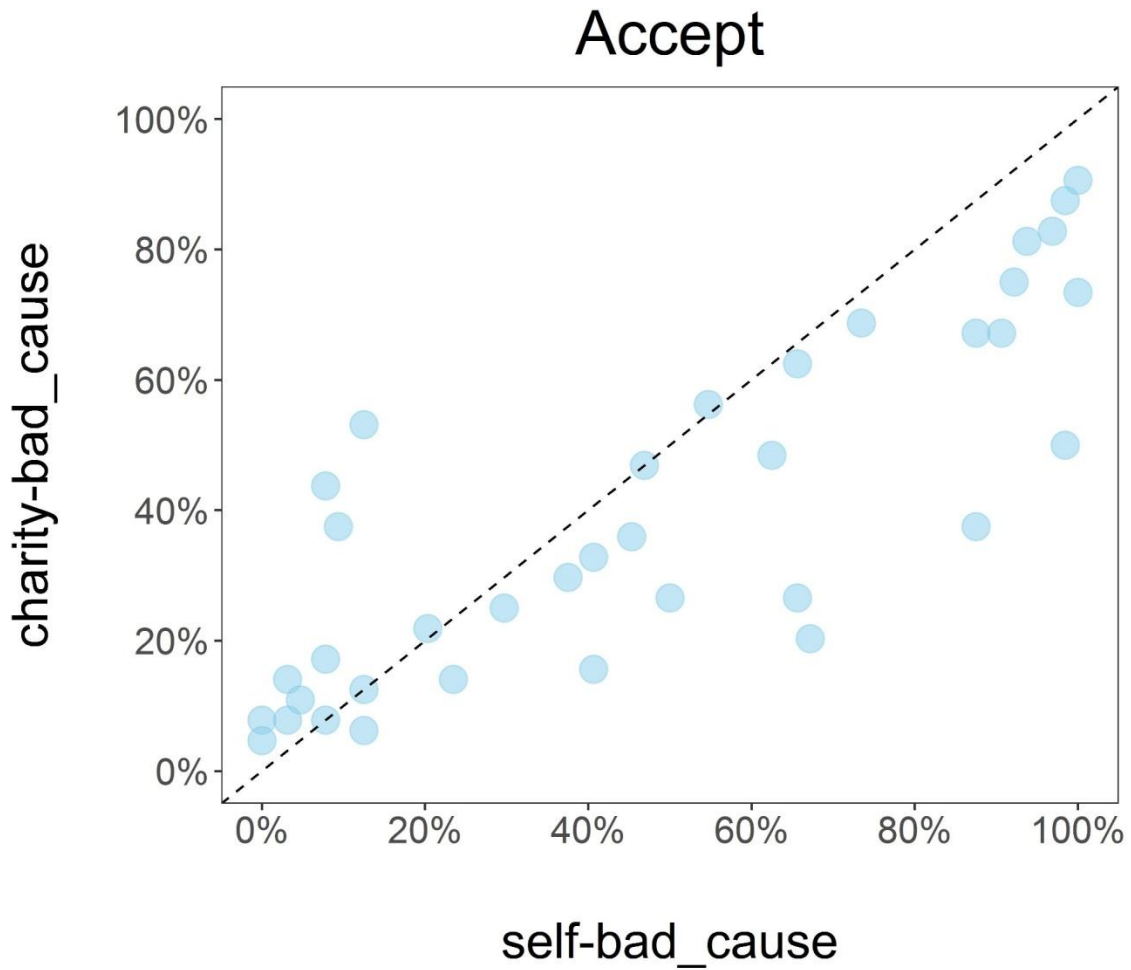

291

292 **Fig. S2. Correlation of acceptance rate between two dilemmas.** Each dot refers to the  
293 acceptance rate of a single participant. Dots below the dotted diagonal indicates participants  
294 who accepts more immoral offers in the *self-bad\_cause* dilemma than in the *charity-bad\_cause*  
295 dilemma.

296

A

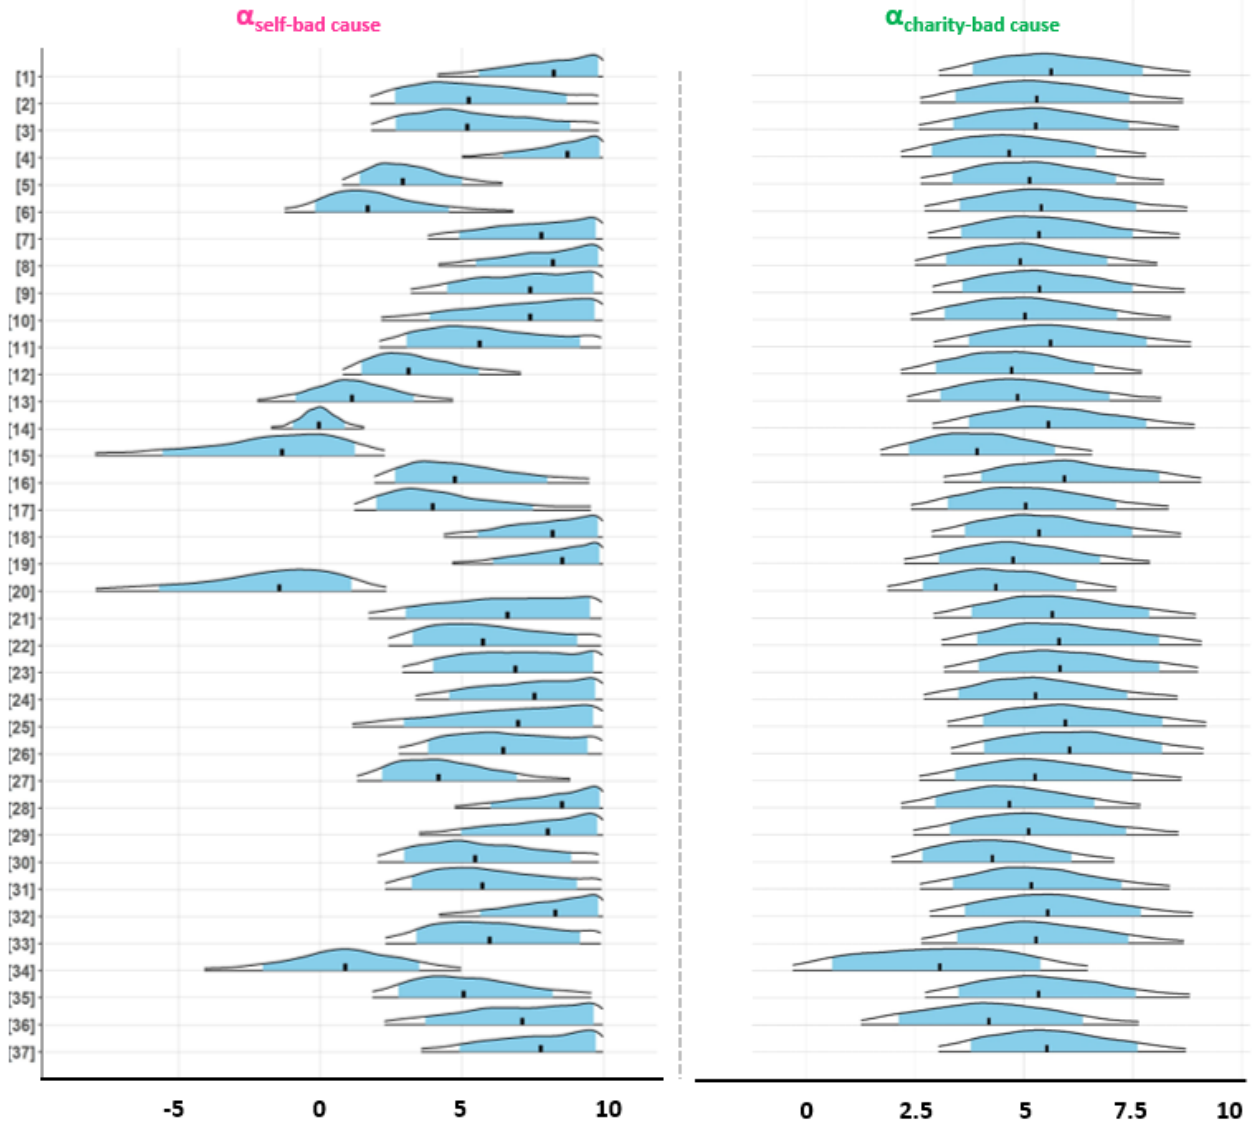



B

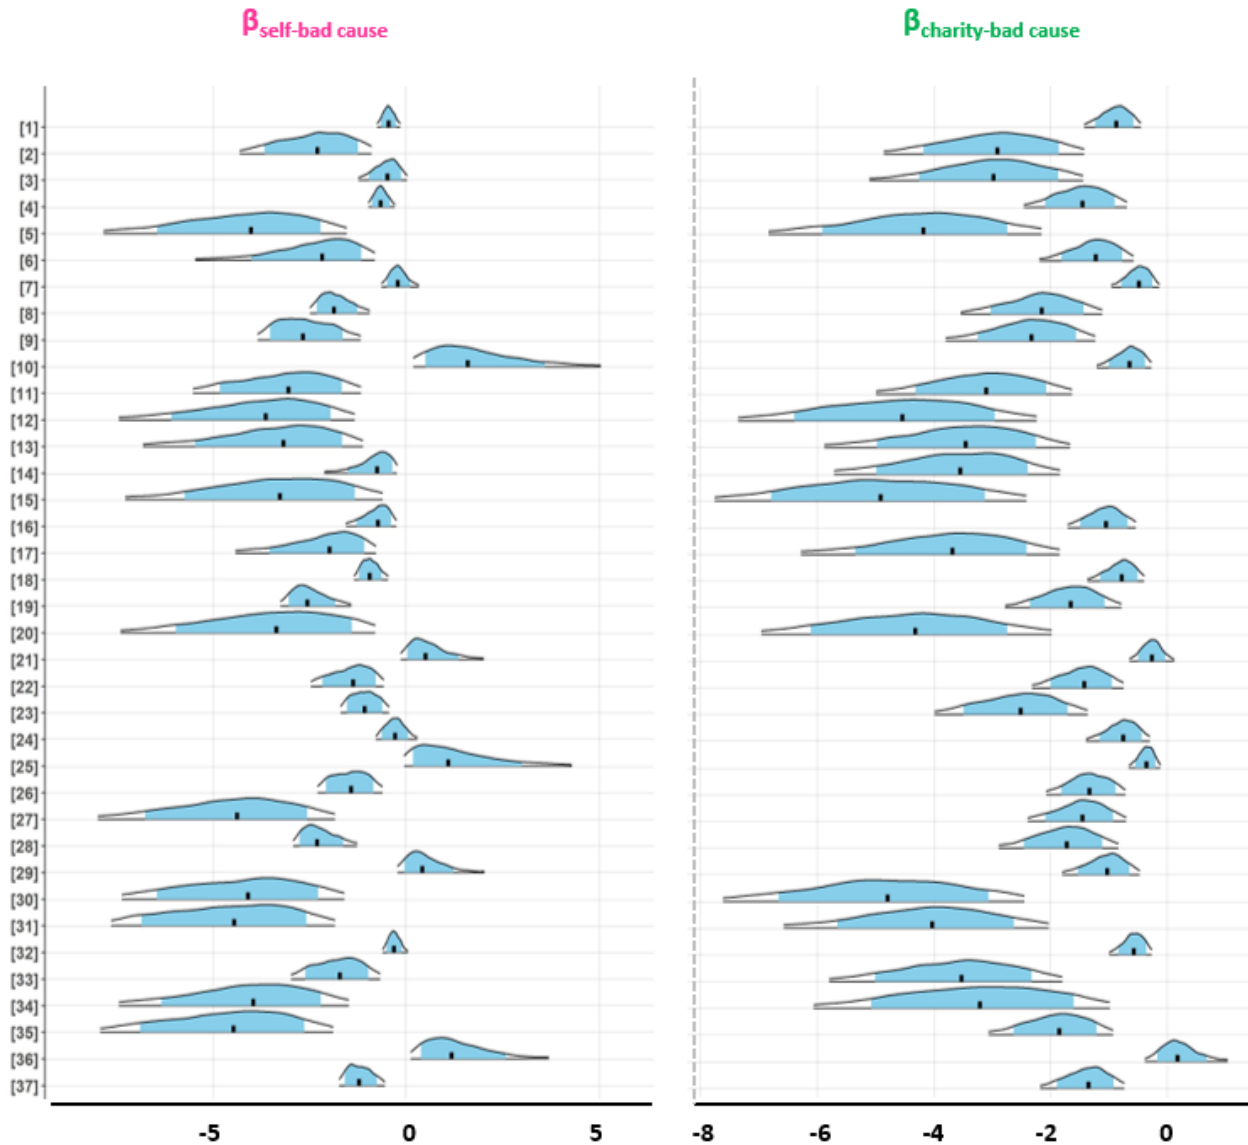

300  
301  
302  
303  
304

**Figure S3** Posterior distributions of individual-level A)  $\alpha$  and B)  $\beta$ . Each distribution indicates the posterior distribution of each parameter of a single participant in each condition. The sky blue shading and tailed white areas represent the 80% and 95% kernel density estimates respectively. The black dots represent the mean of the posterior distribution.

305  
306  
307  
308  
309  
310  
311  
312  
313  
314  
315  
316  
317  
318  
319  
320  
321  
322  
323

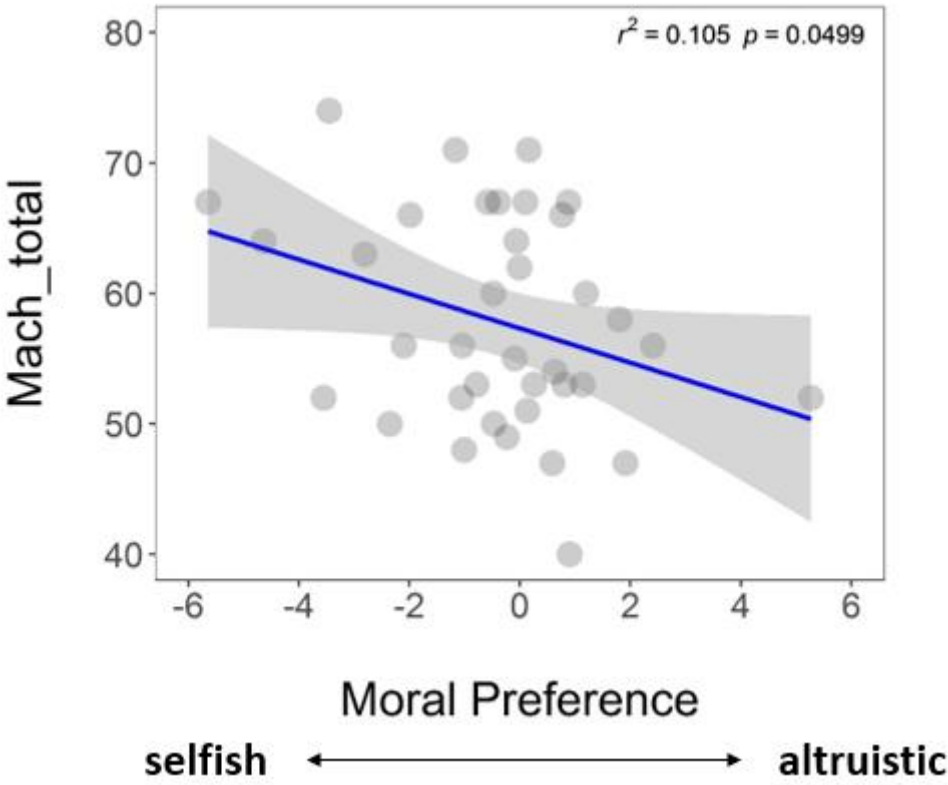

**Fig. S4.** Negative correlation between the moral preference and the Machiavellian score. The higher the Machiavellian score is, the higher degree that a person agrees with the idea of pursuing personal gain via immoral approaches. Each dot represents the data of a single participant.

324  
325  
326  
327  
328  
329  
330  
331  
332

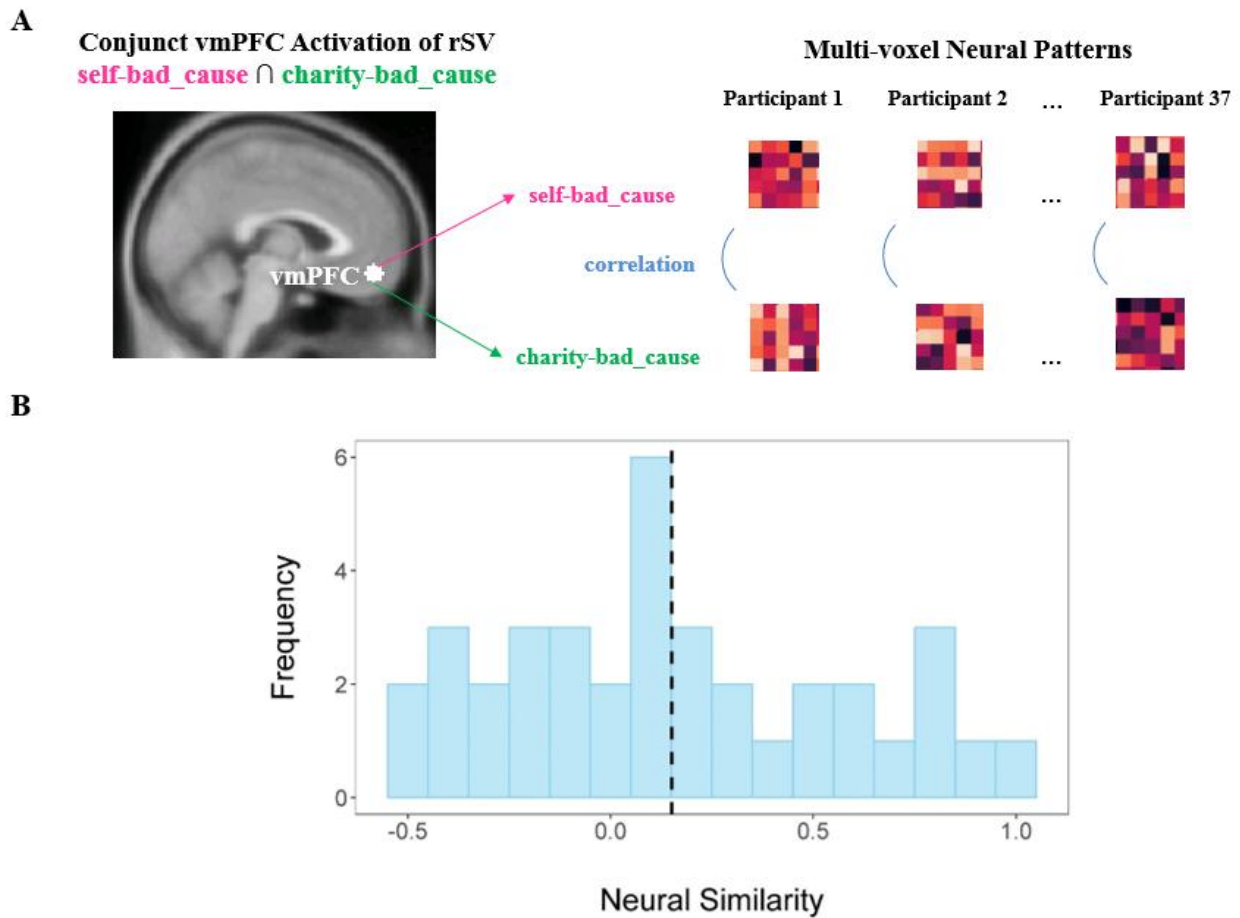

333  
334  
335  
336  
337  
338  
339  
340  
341  
342  
343  
344  
345

**Fig. S5** Procedure and results of representational similarity analysis (RSA). (a) For each participant, we first defined the vmPFC mask based on the conjunction activation in GLM1 (peak MNI: -2/48/-14; a sphere with a radius of 6mm). Then we extracted the multi-voxel neural patterns (i.e., those heat maps; only for illustration) within the vmPFC mask from the contrast image characterizing the parametric effect of relative subjective value (SV) in each dilemma. Next we computed the dissimilarity between these neural patterns in two dilemmas and obtained the correlation coefficients (i.e., similarity) using one minus dissimilarity. For statistical analysis, all correlation coefficients were transformed to Fisher's z value. (b) Histogram of the distribution of neural similarity between across all participants. The vertical dashed line refers to the mean of the neural similarity.

346  
347  
348  
349  
350  
351  
352

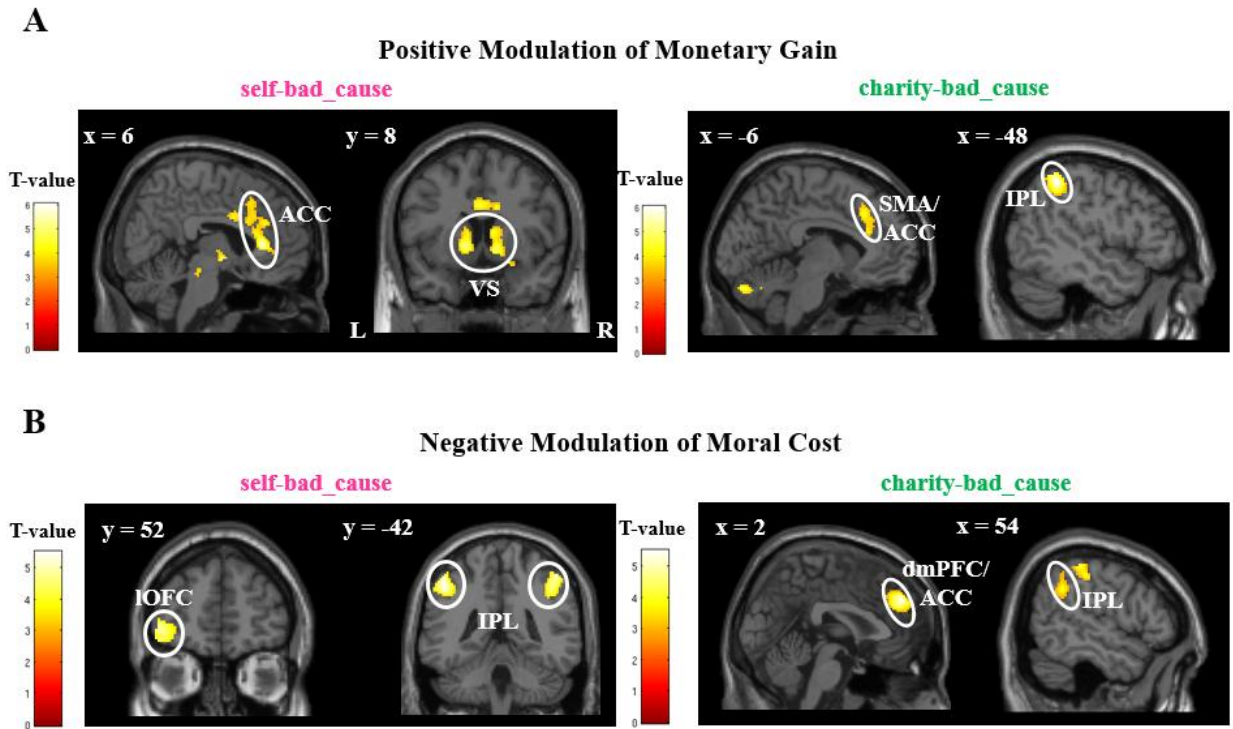

353  
354

355 **Fig. S6.** Neural correlates of single attributes. (a) Positive modulation of the monetary gain (i.e.,  
356 payoff for oneself and the charity) in each dilemma. (b) Negative modulation of the moral cost  
357 (i.e., benefits for the bad cause) in each dilemma. Abbreviation: ACC = anterior cingulate cortex;  
358 dmPFC = dorsomedial prefrontal cortex; SMA = supplementary motor area; IPL = inferior  
359 parietal lobule; IOFC = lateral orbitofrontal cortex; VS = ventral striatum; Display threshold:  $p <$   
360 0.001 uncorrected at the voxel-level with  $k = 200$ .  
361

A

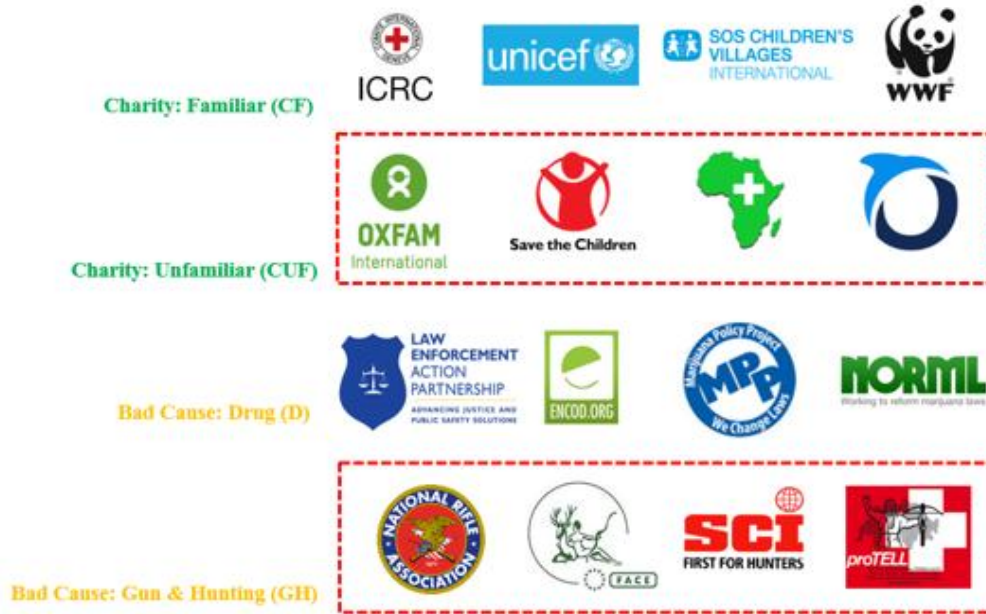

B

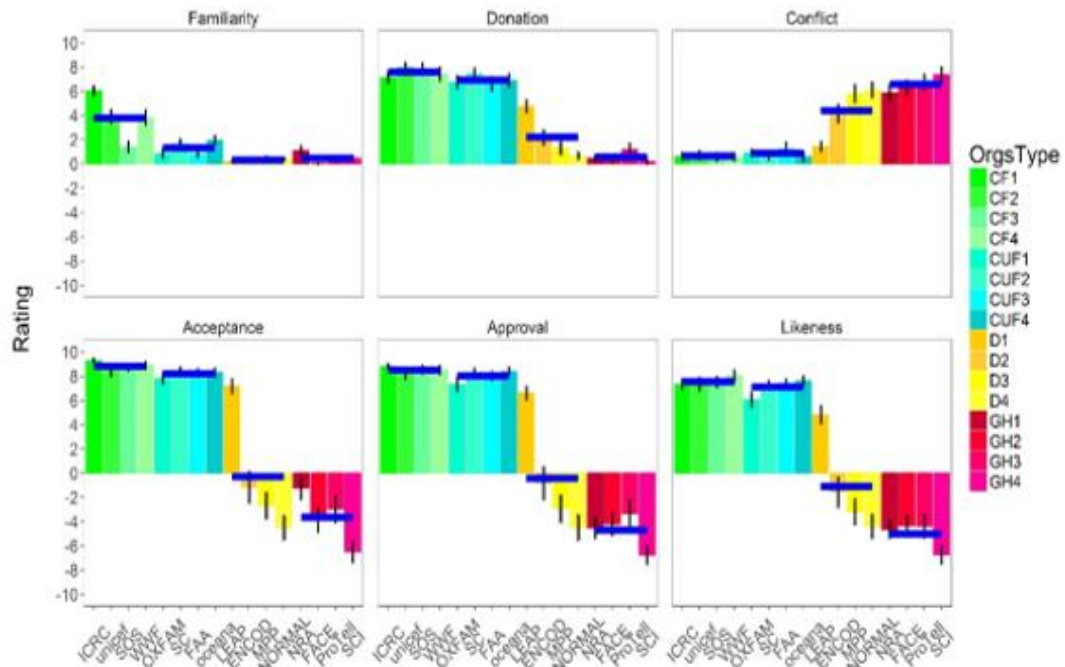

363  
364  
365  
366  
367

**Fig. S7.** (a) All logos of associations used for selection. Those charities and morally bad causes are marked by the red frame we finally used for the pilot. (b) Mean ratings on individual associations as well as categories according to six dimensions in the questionnaire.

368  
369  
370

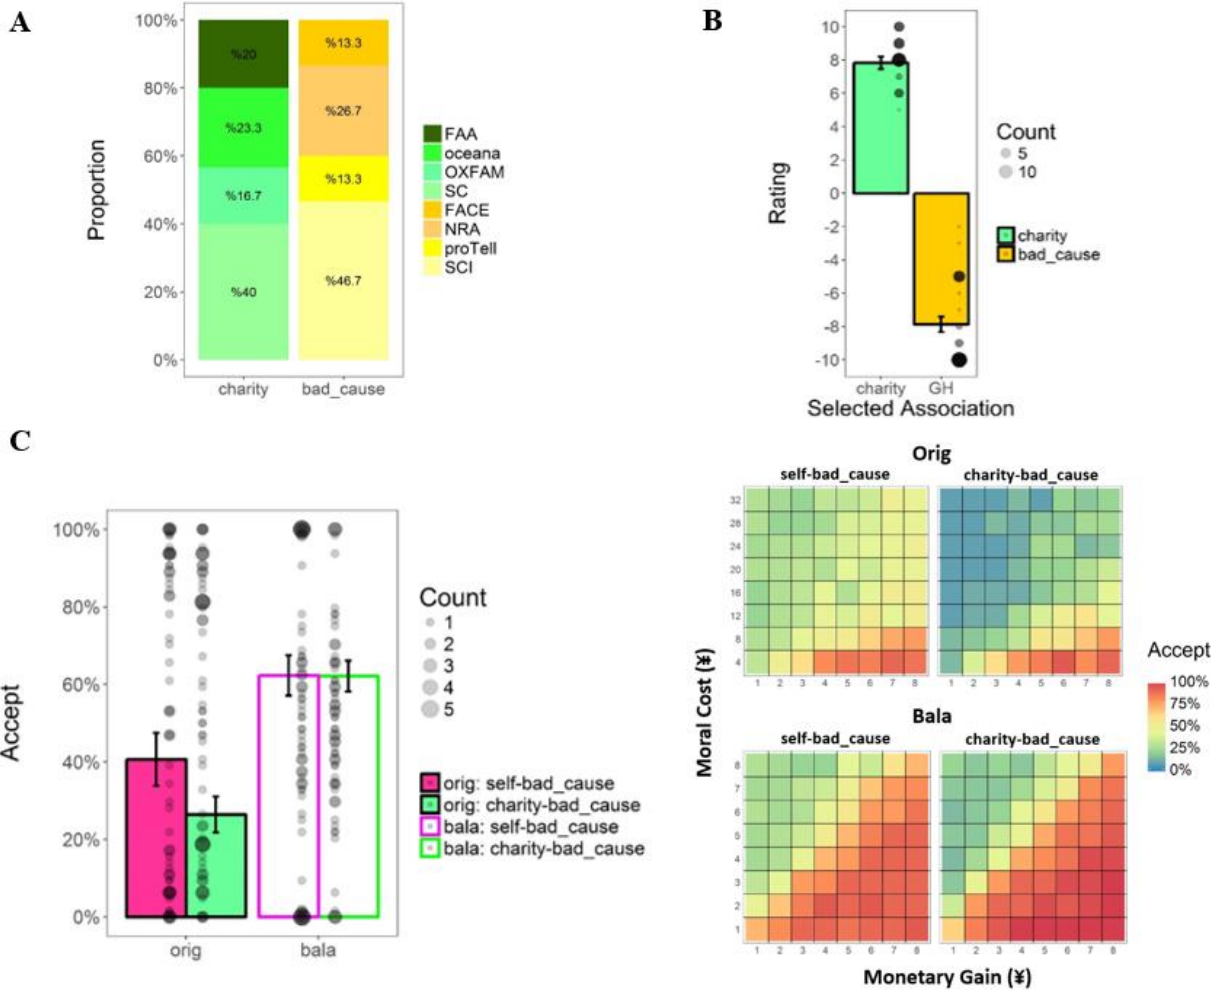

371  
372  
373  
374  
375  
376  
377  
378  
379  
380  
381

**Fig. S8.** Results of the pilot behavioral study. (a) Summary for the charity and the morally bad cause selected by all participants. (b) Mean rating on liking (-10 – 10; -10 = dislike very much, 10 = like very much) for the selected charity and morally bad cause. The black dot refers to the individual ratings; the size of the dot indicates the numbers of participants with the same rating. (c) Left panel: the mean acceptance rate in each dilemma with each payoff matrix; Right panel: the heat map of the mean acceptance rate (%) at each payoff amount for each beneficiary involved in both dilemmas. Abbreviations: orig= original payoff matrix (i.e., monetary gain: moral cost = 1:4); bala = balanced payoff matrix (i.e., monetary gain: moral cost = 1:1).

382  
 383  
 384  
 385  
 386  
 387  
 388  
 389  
 390

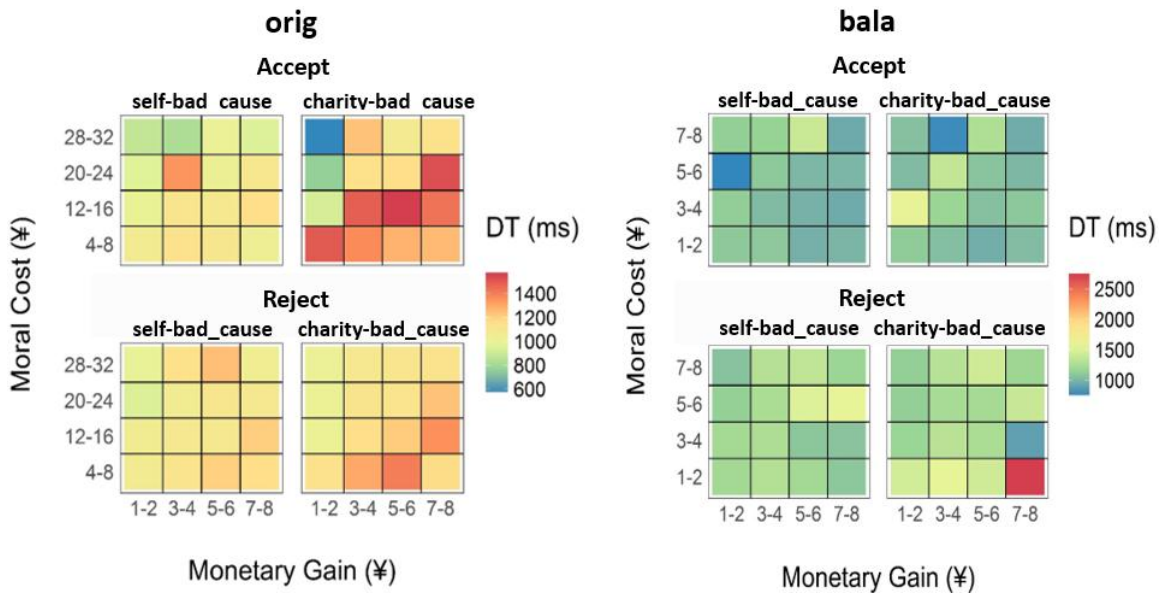

391  
 392  
 393  
 394  
 395  
 396  
 397  
 398  
 399

**Fig. S9.** Heat map of the mean decision time (DT) for specific choice as a function of the monetary gain and the moral cost in each dilemma, separated by different payoff matrix, in the pilot behavioral study. Data were collapsed into 4-by-4 matrices only for a better visualization. Abbreviations: orig= original payoff matrix (i.e., monetary gain: moral cost = 1:4); bala = balanced payoff matrix (i.e., monetary gain: moral cost = 1:1).



400

## Supporting Tables

401 **Table S1.** Bayesian model evidence

402

| Model | WAIC     |
|-------|----------|
| M1    | 2892.081 |
| M2    | 2418.411 |
| M3    | 2885.438 |
| M4*   | 2368.419 |
| M5    | 2958.844 |
| M6    | 2535.073 |
| M7    | 3023.443 |
| M8    | 2609.564 |

403

404 Note: Lower Watanabe-Akaike Information Criterion (WAIC) scores indicate better models.

405 \*refers to the winning model (M4).



406 **Table S2.** Regions encoding the relative subjective value (rSV) during decision-making process  
 407 in each dilemma (N = 37, GLM1)  
 408

| Brain Region                    | Hemisphere | Cluster Size | MNI |     |     | BA                 | T-value | p(cl-FWE) |
|---------------------------------|------------|--------------|-----|-----|-----|--------------------|---------|-----------|
|                                 |            |              | x   | y   | z   |                    |         |           |
| <b><i>self-bad_cause</i></b>    |            |              |     |     |     |                    |         |           |
| <b>rSV: positive modulation</b> |            |              |     |     |     |                    |         |           |
| PCG/MFG                         | L          | 258          | -28 | -8  | 46  | 6                  | 4.49    | 0.046     |
| PCG/MFG                         | R          | 282          | 30  | -4  | 42  | 6                  | 4.67    | 0.034     |
| FuG/LG/PHG/IOG                  | L          | 671          | -36 | -56 | -12 | 19/37              | 5.42    | 0.001     |
| FuG/LG/PHG/<br>MOG/IOG/MTG      | R          | 1652         | 26  | -70 | 2   | 18/19/20/<br>36/37 | 5.47    | < 0.001   |

409  
 410 Note: Regions shown here met the Family-Wise Error corrected cluster-level (cl-FWE) threshold of  $p <$   
 411  $0.05$ , with an uncorrected voxel-level threshold of  $p < 0.001$  as the cluster-defining threshold. No  
 412 significant region was found in positive or negative modulation of rSV in the *charity-bad\_cause* dilemma  
 413 under this threshold. Coordinates shown here were based on Montreal Neurological Institute (MNI)  
 414 coordinate system. Abbreviations: L: left, R: right, B: bilateral, BA: Brodmann Area; MFG: middle frontal  
 415 gyrus, PCG: pre-central gyrus, MTG: middle temporal gyrus, MOG: middle occipital gyrus, IOG: inferior  
 416 occipital gyrus, FG: fusiform gyrus, LG: lingual gyrus, PHG: parahippocampal gyrus.  
 417

418 **Table S3.** Regions showing enhanced functional connectivity with vmPFC in different dilemmas  
 419 (i.e., PPI: *self-bad\_cause* vs. *implicit baseline*; PPI: *charity-bad\_cause* vs. *implicit baseline*; N =  
 420 37, gPPI-GLM)  
 421

| Regions                                                           | Hemisphere | Cluster Size | MNI |     |     | BA                | T-value | p(cl-FWE) |
|-------------------------------------------------------------------|------------|--------------|-----|-----|-----|-------------------|---------|-----------|
|                                                                   |            |              | x   | y   | z   |                   |         |           |
| <b>PPI: <i>self-bad_cause</i> vs. <i>implicit baseline</i></b>    |            |              |     |     |     |                   |         |           |
| vmPFC/MeFG/dmPFC/<br>ACC                                          | B          | 2022         | -2  | 38  | -12 | 9/10/11/<br>24/32 | 11.76   | < 0.001   |
| SFG                                                               | R          | 53           | 22  | 34  | 46  | 8                 | 6.20    | < 0.001   |
| PCC/Prec                                                          | B          | 757          | -4  | -62 | 30  | 7/23/30/31        | 8.30    | < 0.001   |
| MTG/ITG                                                           | L          | 60           | -56 | -12 | -20 | 21                | 7.06    | < 0.001   |
| ITG                                                               | R          | 150          | 60  | -8  | -20 | 21                | 7.77    | < 0.001   |
| IFG/STG                                                           | L          | 67           | -32 | 16  | -22 | 38/47             | 7.69    | < 0.001   |
| AG/SmG/STG/MTG                                                    | L          | 304          | -46 | -66 | 28  | 39                | 7.41    | < 0.001   |
| AG/SmG/STG/MTG                                                    | R          | 331          | 60  | -52 | 28  | 39/40             | 7.86    | < 0.001   |
| Cerebellum                                                        | L          | 57           | -10 | -52 | -36 |                   | 6.53    | < 0.001   |
| <b>PPI: <i>charity-bad_cause</i> vs. <i>implicit baseline</i></b> |            |              |     |     |     |                   |         |           |
| vmPFC/ACC                                                         | B          | 766          | -4  | 50  | -12 | 10/11/32          | 11.40   | < 0.001   |
| PCC/Prec                                                          |            | 310          | -8  | -58 | 10  | 23/30             | 6.82    | < 0.001   |

422  
 423 Note: A FWE-corrected voxel-level threshold of  $p < 0.05$  with  $k = 50$  was adopted. Coordinates shown  
 424 here were based on Montreal Neurological Institute (MNI) coordinate system. Abbreviations: p(cl-FWE):  
 425 cluster-level Family-Wise Error corrected threshold; L: left, R: right, B: bilateral, BA: Brodmann Area; ACC:  
 426 anterior cingulate cortex, AG: angular gyrus, dmPFC: dorsomedial prefrontal cortex, MeFG: medial frontal  
 427 gyrus, MTG, middle temporal gyrus, SFG: superior frontal gyrus, ITG: inferior temporal gyrus, SmG:  
 428 supramarginal gyrus, PCC: posterior cingulate cortex, STG: superior temporal gyrus, vmPFC:  
 429 ventromedial prefrontal cortex, Prec: precuneus.  
 430  
 431

432 **Table S4.** Regions encoding single attributes (i.e., monetary gain and moral cost) during  
 433 decision-making process in each dilemma (N = 37, GLM2)  
 434

| Brain Region                    | Hemisphere | Cluster Size | MNI |     |     | BA       | T-value | p(cl-FWE) |
|---------------------------------|------------|--------------|-----|-----|-----|----------|---------|-----------|
|                                 |            |              | x   | y   | z   |          |         |           |
| <b><i>self-bad_cause</i></b>    |            |              |     |     |     |          |         |           |
| <b>monetary gain:</b>           |            |              |     |     |     |          |         |           |
| <b>positive modulation</b>      |            |              |     |     |     |          |         |           |
| VS (Caud/Put/Pal)/Tha           | L          | 471          | -12 | 0   | -4  |          | 6.06    | 0.005     |
| VS (Caud/Put/Pal)/IFG           | R          | 574          | 14  | 4   | -4  | 47       | 5.03    | 0.002     |
| ACC/MCC/SMA/MeFG/SFG            | B          | 1277         | 6   | 32  | 8   | 8/24/32  | 5.55    | < 0.001   |
| <b>moral cost:</b>              |            |              |     |     |     |          |         |           |
| <b>negative modulation</b>      |            |              |     |     |     |          |         |           |
| IFG/MFG                         | L          | 413          | -54 | 40  | -4  | 10/11/47 | 5.09    | 0.004     |
| MFG/IFG                         | R          | 451          | 36  | 26  | 40  | 8/9      | 4.95    | 0.003     |
| IPL/AG/SmG/PoCG                 | L          | 607          | -48 | -42 | 46  | 40       | 5.51    | < 0.001   |
| IPL/SPL/AG/SmG/STG/PoCG         | R          | 1572         | 48  | -46 | 56  | 7/39/40  | 5.04    | < 0.001   |
| <b><i>charity-bad_cause</i></b> |            |              |     |     |     |          |         |           |
| <b>monetary gain:</b>           |            |              |     |     |     |          |         |           |
| <b>positive modulation</b>      |            |              |     |     |     |          |         |           |
| MeFG/SMA/ACC/MCC                | B          | 445          | -10 | 30  | 38  | 6/8/9/32 | 4.45    | 0.001     |
| IPL                             | R          | 300          | -48 | -42 | 50  | 40       | 6.11    | 0.010     |
| Cerebellum                      | L          | 349          | -32 | -68 | -30 |          | 5.05    | 0.005     |
| Cerebellum                      | R          | 675          | 36  | -58 | -32 |          | 5.00    | < 0.001   |
| <b>moral cost:</b>              |            |              |     |     |     |          |         |           |
| <b>negative modulation</b>      |            |              |     |     |     |          |         |           |
| MeFG/SFG/ACC/MCC                | B          | 1037         | 2   | 46  | 34  | 6/8/9/32 | 6.45    | < 0.001   |
| SFG/MeFG/MFG                    | R          | 330          | 12  | 38  | 52  | 8        | 4.67    | 0.013     |
| IPL/SmG/PoCG/AG                 | R          | 439          | 58  | -26 | 44  | 40       | 5.46    | 0.003     |

435  
 436 Note: Regions shown here met the Family-Wise Error corrected cluster-level (cl-FWE) threshold of  $p <$   
 437 0.05, with an uncorrected voxel-level threshold of  $p < 0.001$  as the cluster-defining threshold. No  
 438 significant region was found in the negative modulation of monetary gain and the positive modulation of  
 439 moral cost, in each dilemma respectively. Coordinates shown here were based on Montreal Neurological  
 440 Institute (MNI) coordinate system. Abbreviations: L: left, R: right, B: bilateral, BA: Brodmann Area; ACC:  
 441 anterior cingulate cortex, MCC; mid-cingulate cortex, MFG: middle frontal gyrus, MeFG: medial frontal  
 442 gyrus, IFG: inferior frontal gyrus, SFG: superior frontal gyrus, SMA: supplementary motor area, AG:  
 443 angular gyrus, PoCG: postcentral gyrus, SmG: supramarginal gyrus, IPL: inferior parietal lobule, STG:  
 444 superior temporal gyrus, VS: ventral striatum; Caud: caudate, Put: putamen, Pal: pallidum.

445 **Table S5.** Summary of average rating (mean  $\pm$  SD) in the rating task for association selection  
 446 (N = 30)

|            |                | Familiarity                     | Likeness                         | Acceptance                       | Approval                         | Donation                        | Conflict                        |
|------------|----------------|---------------------------------|----------------------------------|----------------------------------|----------------------------------|---------------------------------|---------------------------------|
| CF         | ICRC           | 6.0 $\pm$ 2.2                   | 7.3 $\pm$ 2.3                    | 9.3 $\pm$ 1.0                    | 8.8 $\pm$ 1.2                    | 7.1 $\pm$ 2.6                   | 0.6 $\pm$ 1.4                   |
|            | unicef         | 3.9 $\pm$ 3.0                   | 7.3 $\pm$ 2.8                    | 8.4 $\pm$ 2.4                    | 8.2 $\pm$ 2.6                    | 8.0 $\pm$ 2.1                   | 0.7 $\pm$ 1.9                   |
|            | SOS            | 1.4 $\pm$ 2.4                   | 7.5 $\pm$ 2.4                    | 8.7 $\pm$ 1.5                    | 8.5 $\pm$ 1.8                    | 7.9 $\pm$ 2.4                   | 0.6 $\pm$ 1.9                   |
|            | WWF            | 3.8 $\pm$ 3.3                   | 8.0 $\pm$ 2.5                    | 8.9 $\pm$ 1.5                    | 8.5 $\pm$ 2.0                    | 7.4 $\pm$ 3.1                   | 0.6 $\pm$ 1.8                   |
|            | pooled         | 3.8 $\pm$ 2.0                   | 7.6 $\pm$ 1.8                    | 8.8 $\pm$ 1.3                    | 8.5 $\pm$ 1.5                    | 7.6 $\pm$ 2.2                   | 0.6 $\pm$ 1.6                   |
| <b>CUF</b> | <b>OXFAM</b>   | <b>0.9 <math>\pm</math> 1.9</b> | <b>6.1 <math>\pm</math> 3.3</b>  | <b>7.8 <math>\pm</math> 2.4</b>  | <b>7.3 <math>\pm</math> 3.0</b>  | <b>6.7 <math>\pm</math> 2.8</b> | <b>0.9 <math>\pm</math> 1.6</b> |
|            | <b>SC</b>      | <b>1.7 <math>\pm</math> 2.0</b> | <b>7.3 <math>\pm</math> 2.0</b>  | <b>8.4 <math>\pm</math> 2.0</b>  | <b>8.3 <math>\pm</math> 2.0</b>  | <b>7.4 <math>\pm</math> 2.4</b> | <b>0.7 <math>\pm</math> 2.0</b> |
|            | <b>FAA</b>     | <b>0.8 <math>\pm</math> 1.7</b> | <b>7.4 <math>\pm</math> 1.6</b>  | <b>8.3 <math>\pm</math> 1.7</b>  | <b>8.0 <math>\pm</math> 1.9</b>  | <b>6.6 <math>\pm</math> 3.0</b> | <b>1.3 <math>\pm</math> 2.8</b> |
|            | <b>Oceana</b>  | <b>2.0 <math>\pm</math> 2.1</b> | <b>7.6 <math>\pm</math> 2.2</b>  | <b>8.3 <math>\pm</math> 1.9</b>  | <b>8.4 <math>\pm</math> 1.8</b>  | <b>6.9 <math>\pm</math> 2.9</b> | <b>0.6 <math>\pm</math> 2.0</b> |
|            | <b>pooled</b>  | <b>1.3 <math>\pm</math> 1.4</b> | <b>7.1 <math>\pm</math> 1.7</b>  | <b>8.2 <math>\pm</math> 1.6</b>  | <b>8.0 <math>\pm</math> 1.7</b>  | <b>6.9 <math>\pm</math> 2.2</b> | <b>0.9 <math>\pm</math> 1.7</b> |
| D          | LEAP           | 0.2 $\pm$ 0.6                   | 4.8 $\pm$ 4.2                    | 7.2 $\pm$ 3.1                    | 6.6 $\pm$ 3.0                    | 4.8 $\pm$ 2.7                   | 1.4 $\pm$ 2.3                   |
|            | ENCOD          | 0.3 $\pm$ 0.8                   | -1.6 $\pm$ 6.7                   | -1.2 $\pm$ 6.9                   | -0.8 $\pm$ 7.2                   | 2.2 $\pm$ 3.3                   | 4.2 $\pm$ 4.0                   |
|            | MPP            | 0.4 $\pm$ 1.5                   | -3.2 $\pm$ 5.7                   | -2.7 $\pm$ 5.9                   | -2.9 $\pm$ 6.1                   | 1.3 $\pm$ 2.9                   | 5.8 $\pm$ 3.8                   |
|            | NORML          | 0.4 $\pm$ 0.9                   | -4.4 $\pm$ 5.4                   | -4.5 $\pm$ 5.6                   | -4.5 $\pm$ 5.7                   | 0.7 $\pm$ 1.7                   | 6.1 $\pm$ 3.5                   |
|            | pooled         | 0.3 $\pm$ 0.7                   | -1.1 $\pm$ 3.7                   | -0.3 $\pm$ 3.6                   | -0.4 $\pm$ 3.8                   | 2.2 $\pm$ 2.0                   | 4.4 $\pm$ 2.3                   |
| <b>GH</b>  | <b>NRA</b>     | <b>1.1 <math>\pm</math> 2.1</b> | <b>-4.7 <math>\pm</math> 4.0</b> | <b>-1.2 <math>\pm</math> 5.0</b> | <b>-4.5 <math>\pm</math> 4.7</b> | <b>0.5 <math>\pm</math> 1.5</b> | <b>5.9 <math>\pm</math> 3.5</b> |
|            | <b>FACE</b>    | <b>0.0 <math>\pm</math> 0.2</b> | <b>-4.3 <math>\pm</math> 4.6</b> | <b>-3.9 <math>\pm</math> 5.2</b> | <b>-4.2 <math>\pm</math> 5.2</b> | <b>0.4 <math>\pm</math> 1.5</b> | <b>6.3 <math>\pm</math> 3.2</b> |
|            | <b>proTELL</b> | <b>0.3 <math>\pm</math> 0.9</b> | <b>-4.4 <math>\pm</math> 5.2</b> | <b>-3.0 <math>\pm</math> 5.9</b> | <b>-3.3 <math>\pm</math> 6.0</b> | <b>1.2 <math>\pm</math> 2.7</b> | <b>6.8 <math>\pm</math> 3.4</b> |
|            | <b>SCI</b>     | <b>0.5 <math>\pm</math> 1.2</b> | <b>-6.7 <math>\pm</math> 4.0</b> | <b>-6.5 <math>\pm</math> 4.7</b> | <b>-6.8 <math>\pm</math> 4.1</b> | <b>0.2 <math>\pm</math> 1.1</b> | <b>7.4 <math>\pm</math> 3.4</b> |
|            | <b>pooled</b>  | <b>0.5 <math>\pm</math> 0.8</b> | <b>-5.0 <math>\pm</math> 2.9</b> | <b>-3.7 <math>\pm</math> 3.1</b> | <b>-4.7 <math>\pm</math> 3.1</b> | <b>0.6 <math>\pm</math> 1.2</b> | <b>6.6 <math>\pm</math> 2.5</b> |

447 Note: Pooled results refer to the average rating by pooling 4 associations within each type of associations  
 448 (i.e., charity unfamiliar, CUF; charity familiar, CF; drug legalization group, D; gun/hunting rights advocacy  
 449 group, GH). Bold texts indicate ratings for those associations finally selected for the pilot behavioral study  
 450 and the current fMRI study. See the above section “vignettes used in the pilot rating task” for full names of  
 451 all these associations.  
 452

453 **Table S6.** Output of fixed effects in mixed-effect logistic regressions predicting accept decisions  
 454 in the pilot behavioral study  
 455

|                            | All trials      | Trials in the block<br>with original payoff<br>matrix | Trials in the block<br>with balanced<br>payoff matrix |
|----------------------------|-----------------|-------------------------------------------------------|-------------------------------------------------------|
|                            | <i>b</i> (SE)   | <i>b</i> (SE)                                         | <i>b</i> (SE)                                         |
| Intercept                  | 0.59 (0.48)***  | 0.29 (0.51)                                           | -4.69 (0.69)***                                       |
| Matrix                     | -0.54 (0.12)*** |                                                       |                                                       |
| Dilemma                    | -1.48 (0.11)*** | -1.44 (0.11)***                                       | -0.02 (0.12)                                          |
| Matrix × Dilemma           | 1.46 (0.14)***  |                                                       |                                                       |
| Monetary Gain <sup>a</sup> | 0.60 (0.02)***  | 0.49 (0.03)***                                        | 1.09 (0.04)***                                        |
| Moral Cost <sup>b</sup>    | -0.18 (0.01)*** | -0.14 (0.01)***                                       | -0.96 (0.04)***                                       |
| AIC                        | 5499.1          | 2532.6                                                | 2047.9                                                |
| BIC                        | 5547.7          | 2563.9                                                | 2079.1                                                |
| Numbers of Observation     | 7680            | 3840                                                  | 3840                                                  |
| N (Participant)            | 30              | 30                                                    | 30                                                    |

456 Note: <sup>a</sup>Monetary Gain: payoffs for participants (*self-bad\_cause* dilemma) or the pre-selected charity  
 457 (charity-bad\_cause dilemma); grand mean-centered before putting into the regression model; <sup>b</sup>Moral Cost:  
 458 benefits for the pre-selected bad cause (in both dilemma); grand mean-centered before putting into the  
 459 regression model.  
 460

461 Reference levels were set as follows: Matrix = original payoff matrix (i.e., monetary gain: moral  
 462 cost = 1:4), Dilemma = *self-bad\_cause* dilemma. Table also shows goodness-of-fit statistics: AIC =  
 463 Akaike Information Criterion, BIC = Bayesian Information Criterion. Significance: \*\*\*  $p < 0.001$ .  
 464  
 465  
 466

467 **Table S7.** Descriptive summary for the decision time (DT) and log-transformed DT (logDT; in  
 468 ms) in the pilot behavioral study  
 469

|        |          | DT                 |                       |                    |                       | logDT              |                       |                    |                       |
|--------|----------|--------------------|-----------------------|--------------------|-----------------------|--------------------|-----------------------|--------------------|-----------------------|
|        |          | Original           |                       | Balanced           |                       | Original           |                       | Balanced           |                       |
|        |          | self-<br>bad_cause | charity-<br>bad_cause | self-<br>bad_cause | charity-<br>bad_cause | self-<br>bad_cause | charity-<br>bad_cause | self-<br>bad_cause | charity-<br>bad_cause |
| Accept | Mean     | 1143.6             | 1351.7                | 1067.8             | 1094.7                | 6.96               | 7.12                  | 6.86               | 6.89                  |
|        | (SD)     | (355.7)            | (350.6)               | (400.0)            | (363.8)               | (0.33)             | (0.32)                | (0.36)             | (0.34)                |
|        | <i>N</i> | 28                 | 28                    | 28                 | 30                    | 28                 | 28                    | 28                 | 30                    |
| Reject | Mean     | 1143.3             | 1134.4                | 1248.5             | 1268.7                | 6.95               | 6.95                  | 7.05               | 7.06                  |
|        | (SD)     | (327.8)            | (295.2)               | (311.3)            | (351.3)               | (0.27)             | (0.27)                | (0.25)             | (0.27)                |
|        | <i>N</i> | 27                 | 28                    | 25                 | 27                    | 27                 | 28                    | 25                 | 27                    |

470  
 471 Note: we first calculated the individual-level mean DT and logDT in terms of specific decisions for each  
 472 context of moral dilemma in each type of payoff matrix, then we calculated the group-level mean ( $\pm$  SD)  
 473 based on the individual mean; Due to individual difference in decisions, the sample size (i.e., *N*) in original  
 474 payoff matrix (i.e., monetary gain: moral cost = 1:4) and balanced payoff matrix (i.e., monetary gain: moral  
 475 cost = 1:1) for each dilemma context of specific decisions is different.  
 476

477 **Table S8.** Output of fixed effects in mixed-effect linear regressions predicting logDT in the pilot  
 478 behavioral study  
 479

|                                | All trials                    | Accept trials                | Accept trials<br>(original matrix) | Accept trials<br>(balanced<br>matrix) | Reject trials                 |
|--------------------------------|-------------------------------|------------------------------|------------------------------------|---------------------------------------|-------------------------------|
|                                | <i>b</i> (SE)                 | <i>b</i> (SE)                | <i>b</i> (SE)                      | <i>b</i> (SE)                         | <i>b</i> (SE)                 |
| Intercept                      | 6.87 (0.05) <sup>***</sup>    | 6.97 (0.06) <sup>***</sup>   | 6.95 (0.06) <sup>***</sup>         | 7.00 (0.07) <sup>***</sup>            | 7.01 (0.05) <sup>***</sup>    |
| Decision                       | -0.003 (0.02)                 |                              |                                    |                                       |                               |
| Matrix                         | -0.09 (0.02) <sup>***</sup>   | -0.09 (0.02) <sup>***</sup>  |                                    |                                       | 0.07 (0.02) <sup>***</sup>    |
| Dilemma                        | 0.16 (0.02) <sup>***</sup>    | 0.15 (0.02) <sup>***</sup>   | 0.15 (0.02) <sup>***</sup>         | 0.04 (0.01) <sup>**</sup>             | 0.01 (0.01)                   |
| Decision × Matrix              | 0.18 (0.02) <sup>***</sup>    |                              |                                    |                                       |                               |
| Decision × Dilemma             | -0.10 (0.02) <sup>***</sup>   |                              |                                    |                                       |                               |
| Matrix × Dilemma               | -0.12 (0.02) <sup>***</sup>   | -0.12 (0.02) <sup>***</sup>  |                                    |                                       | 0.02 (0.02)                   |
| Decision × Matrix ×<br>Dilemma | 0.10 (0.03) <sup>**</sup>     |                              |                                    |                                       |                               |
| Monetary Gain <sup>a</sup>     | 0.007 (0.002) <sup>***</sup>  | -0.02 (0.003) <sup>***</sup> | -0.01 (0.005) <sup>**</sup>        | -0.02 (0.003) <sup>***</sup>          | 0.02 (0.002) <sup>***</sup>   |
| Moral Cost <sup>b</sup>        | -0.003 (0.001) <sup>***</sup> | 0.001 (0.001)                | 0.001 (0.001)                      | 0.02 (0.003) <sup>***</sup>           | -0.005 (0.001) <sup>***</sup> |
| AIC                            | 5534.5                        | 2658.8                       | 929.2                              | 1419.4                                | 2169.5                        |
| BIC                            | 5617.9                        | 2708.5                       | 960.2                              | 1454.0                                | 2219.8                        |
| Numbers of<br>Observation      | 7680                          | 3676                         | 1287                               | 2389                                  | 4004                          |
| N (Participant)                | 30                            | 30                           | 29                                 | 30                                    | 29                            |

480  
 481 Note: <sup>a</sup>Monetary Gain: payoff for participants (*self-bad\_cause* dilemma) or the pre-selected charity  
 482 (*charity-bad\_cause* dilemma); grand mean-centered before putting into the regression model; <sup>b</sup>Moral Cost:  
 483 benefits for the pre-selected bad cause (in both dilemmas); grand mean-centered before putting into the  
 484 regression model.

485 Reference levels were set as follows: Decision = accept, Matrix = original payoff matrix (i.e.,  
 486 monetary gain: moral cost = 1:4), Dilemma = *self-bad\_cause* dilemma. Table also shows goodness-of-fit  
 487 statistics: AIC = Akaike Information Criterion, BIC = Bayesian Information Criterion. Significance: \* p < 0.05,  
 488 \*\*\* p < 0.001.

489

490 **References**

491

492 Bates D, Maechler M, Bolker B. 2013. lme4: Linear mixed-effects models using S4  
493 classes. R package version 0.999999-0. 2012. URL: [http://CRAN](http://CRAN.R-project.org/package=lme4)  
494 org/package=lme4.

495 Fox J, Weisberg S, Adler D, Bates D, Baud-Bovy G, Ellison S, Firth D, Friendly M,  
496 Gorjanc G, Graves S. 2016. Package 'car'.

497 Kleiman E. 2017. EMAtools: data management tools for real-time monitoring/ecological  
498 momentary assessment data.

499 Luke SG. 2017. Evaluating significance in linear mixed-effects models in R. Behavior  
500 Research Methods. 49:1494-1502.

501 R Core Team. 2014. R: A language and environment for statistical computing.

502 Wickham H. 2016. ggplot2: elegant graphics for data analysis.

503
